# Supplementary material for: NK cells eliminate Epstein-Barr virus bound to B cells through a specific antibody-mediated uptake
Source: PubMed Central journal article supplement (PMC8409624; doi:10.1371/journal.ppat.1009868), 2021-08-20
Supplement: ppat.1009868.s001.pdf [file ppat.1009868.s001.pdf]

## S1 Supplementary figure

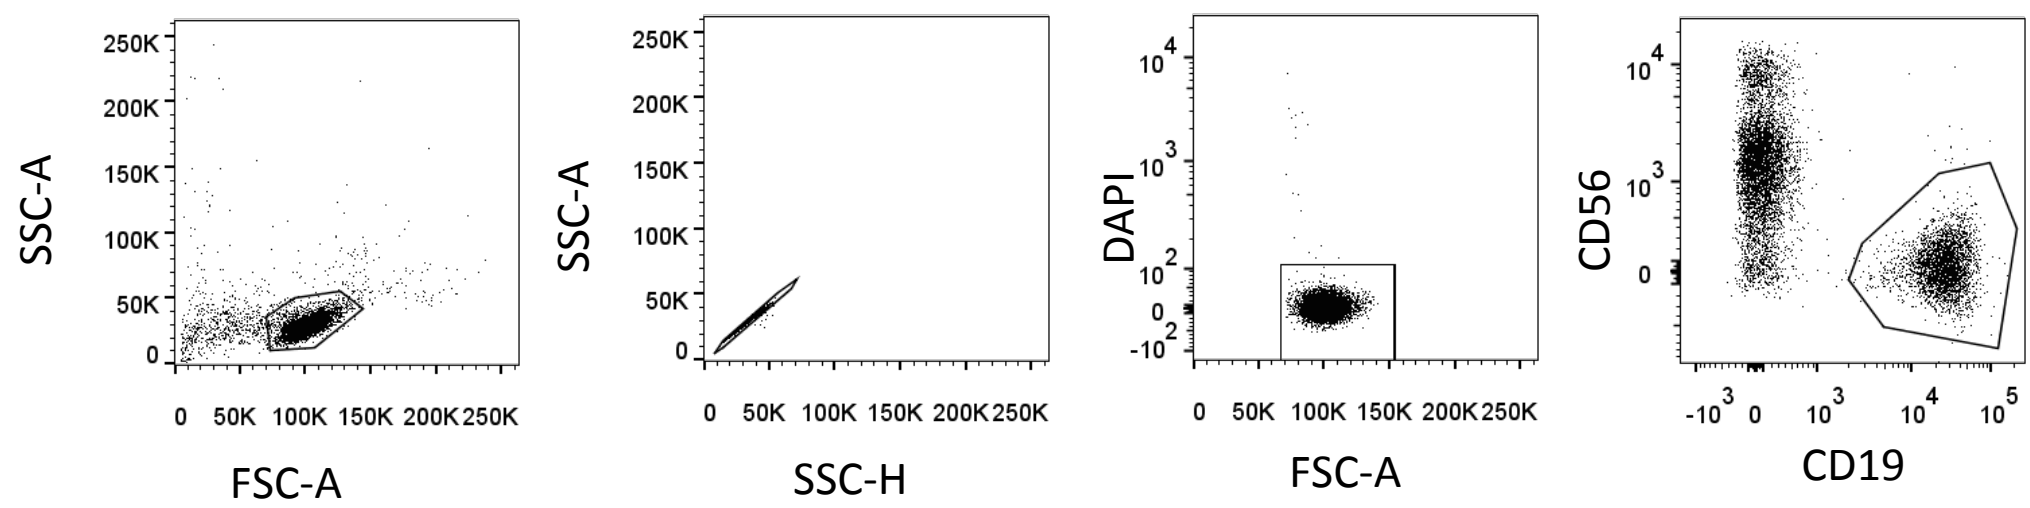

**S1 Supplementary figure. Representative gating strategy for B cells in B-NK cell co-cultures.**
