# Supplementary material for: NK cells eliminate Epstein-Barr virus bound to B cells through a specific antibody-mediated uptake
Source: PubMed Central journal article supplement (PMC8409624; doi:10.1371/journal.ppat.1009868), 2021-08-20
Supplement: ppat.1009868.s002.pdf [file ppat.1009868.s002.pdf]

## S2 Supplementary figure

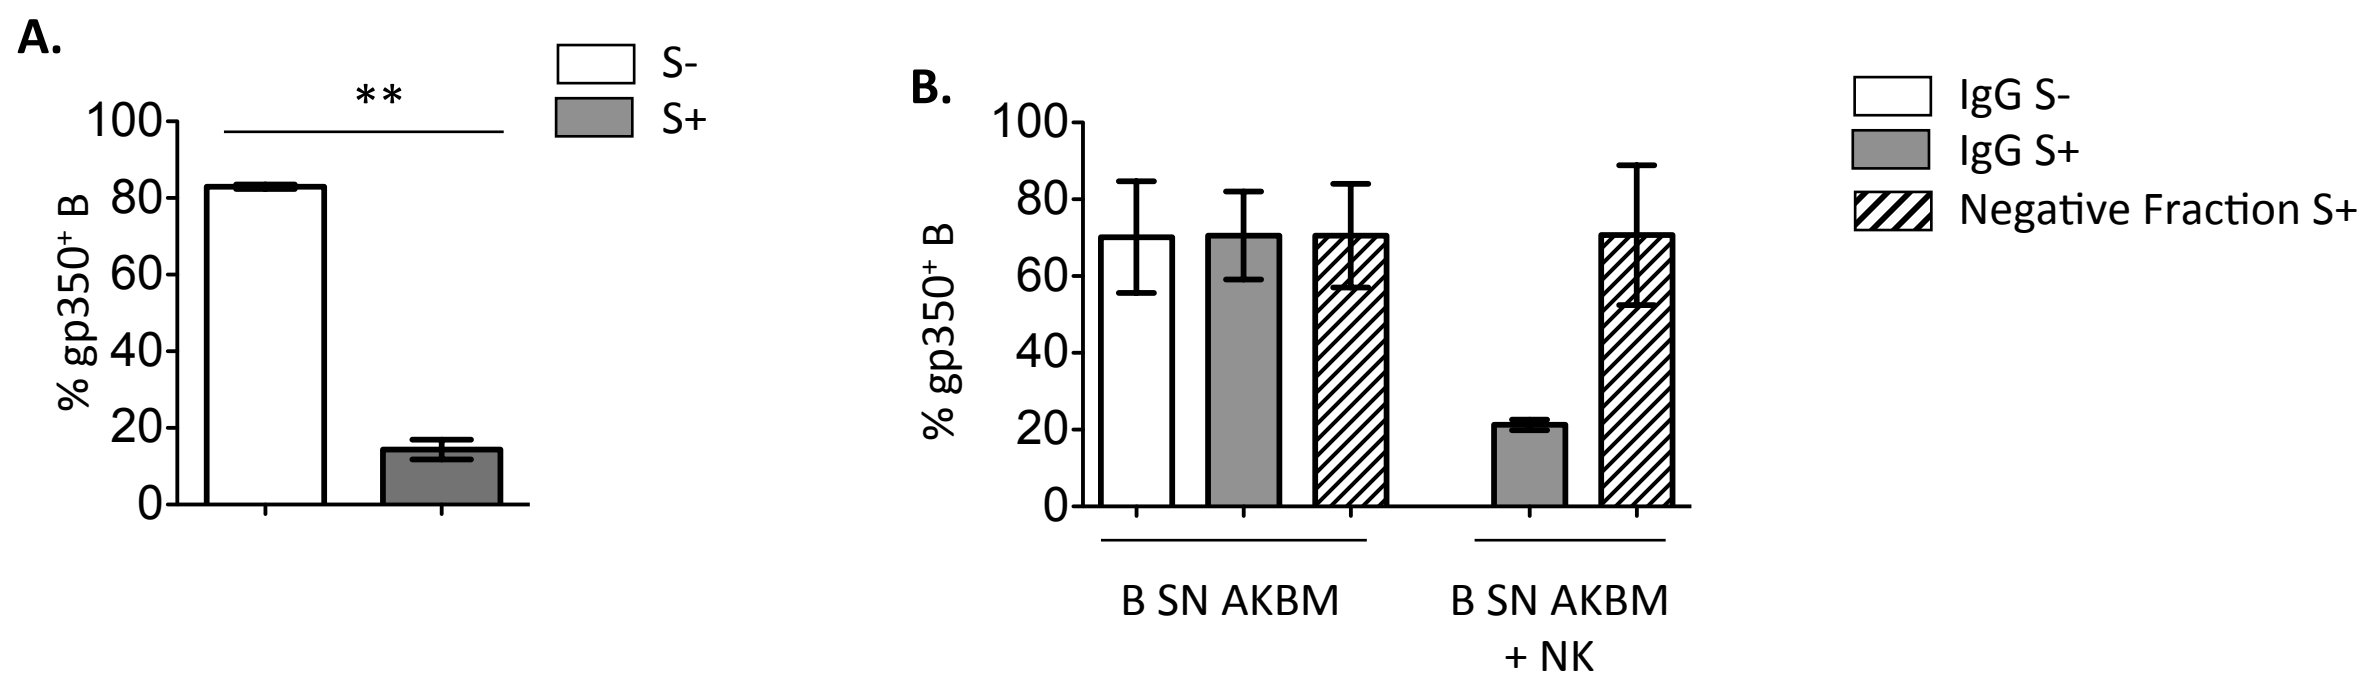

### S2 Supplementary figure. Serum and purified serum IgG from EBV+ donors promotes NK cell-

**mediated elimination of viral particles coating B cells. (A, B)** B cells were incubated with AKBM SN and

stained for gp350. **(A)** B cells cultured with NK and 3% of serum from EBV S- (n=5) and EBV S+ (n=6)

donors for 4h at 37°C. The percentage of gp350<sup>+</sup> B was analyzed. Statistical analysis was performed with

Mann-Whitney test. **(B)** B cells were cultured with or without NK cells, and with 0.45mg/ml IgG purified

from EBV S- or S+ serum or the equivalent IgG-negative fraction of EBV S+ serum. The percentage of

gp350<sup>+</sup> B cells of two experiments is shown.
